# Supplementary material
Source: bioRxiv or medRxiv preprint supplement (https://medrxiv.org/highwire/filestream/92415/field_highwire_adjunct_files/0/2020.08.06.20169409-1.pdf)
Supplement: Supplementary file [file 2020.08.06.20169409-1.pdf]

**SUPPLEMENTARY INFORMATION**

Table S1. Access and perceived reliability of information sources

| Information sources           | Access<br>Number (weighted %) |             | Perceived reliability<br>Number (weighted %) |             |
|-------------------------------|-------------------------------|-------------|----------------------------------------------|-------------|
|                               | UK (n=1768)                   | HK (n=1663) | UK (n=1768)                                  | HK (n=1663) |
| <b>Public channel</b>         |                               |             |                                              |             |
| Social media platform         | 625 (36.0)                    | 1560 (92.2) | 187 (10.9)                                   | 434 (27.8)  |
| Newspapers                    | 827 (46.3)                    | 665 (38.6)  | -                                            | 907 (50.9)  |
| Magazines                     | 58 (3.3)                      | 104 (7.3)   | -                                            | 364 (20.3)  |
| Radio                         | 721 (40.7)                    | 569 (36.2)  | -                                            | 959 (55.2)  |
| Television                    | 1305 (73.5) <sup>a</sup>      | 1155 (67.9) | -                                            | 651 (37.8)  |
| Streaming                     |                               |             | 139 (8.1)                                    | -           |
| Official websites             | 1126 (64.0) <sup>b</sup>      | 1496 (89.3) | 1602 (90.7)                                  | 260 (15.5)  |
| Unofficial websites           |                               |             | 138 (8.1)                                    | 380 (26.2)  |
| <b>Personal communication</b> |                               |             |                                              |             |
| My families/friends           | 866 (49.4) <sup>c</sup>       | 931 (54.0)  | 582 (33.0)                                   | 593 (40.6)  |
| Work/school/college           |                               |             | 828 (47.5)                                   | -           |
| <b>Professionals</b>          |                               |             |                                              |             |
| My doctor                     | 202 (11.5) <sup>d</sup>       | 86 (4.7)    | 1542 (87.2)                                  | 1408 (84.3) |
| Other health professionals    |                               |             | 1497 (84.7)                                  | -           |
| <b>Others</b>                 |                               |             |                                              |             |
| Others                        | 9 (0.5)                       | 10 (0.7)    | -                                            | -           |

<sup>a</sup> UK separately asked about the two options, with the number of respondents reporting access to television being 1292 (72.7%) and that to streaming services being 31 (1.8%).

<sup>b</sup> UK separately asked about the two options, with the number of respondents reporting access to official websites being 1101 (62.6%) and that to unofficial websites being 162 (9.6%).

<sup>c</sup> UK separately asked about the two options, with the number of respondents reporting access to my families/friends being 577 (32.8%) and that to work/school/college being 537 (31.1)

<sup>d</sup> UK separately asked about the two options, with the number of respondents reporting access to my doctor being 82 (4.6%) and that to other health professionals being 140 (8.0%).

Table S2. Univariate analysis of factors associated with the adoption of different types of social distancing

| Factors                                              | Types of social distancing    |         |                               |         |                            |         |
|------------------------------------------------------|-------------------------------|---------|-------------------------------|---------|----------------------------|---------|
|                                                      | General <sup>a</sup> (n=3431) |         | Contact <sup>b</sup> (n=3431) |         | Work <sup>c</sup> (n=2160) |         |
|                                                      | OR (95% CI)                   | P-value | OR (95% CI)                   | P-value | OR (95% CI)                | P-value |
| <b>Age</b>                                           |                               |         |                               |         |                            |         |
| 18-24                                                | -                             | -       | -                             | -       | -                          | -       |
| 25-34                                                | 1.30 (1.05, 1.60)             | 0.02    | 0.87 (0.69, 1.09)             | 0.23    | 1.04 (0.76, 1.44)          | 0.80    |
| 35-44                                                | 0.91 (0.73, 1.13)             | 0.40    | 0.50 (0.40, 0.63)             | <0.001  | 0.88 (0.63, 1.22)          | 0.43    |
| 45-54                                                | 0.81 (0.64, 1.04)             | 0.09    | 0.35 (0.28, 0.46)             | <0.001  | 0.56 (0.39, 0.81)          | 0.002   |
| 55+                                                  | 0.64 (0.52, 0.79)             | <0.001  | 0.28 (0.22, 0.34)             | <0.001  | 0.43 (0.28, 0.65)          | <0.001  |
| <b>Sex</b>                                           |                               |         |                               |         |                            |         |
| Female                                               | -                             | -       | -                             | -       | -                          | -       |
| Male                                                 | 0.68 (0.59, 0.78)             | <0.001  | 0.56 (0.49, 0.64)             | <0.001  | 0.86 (0.71, 1.04)          | 0.11    |
| <b>Education attainment <sup>d</sup></b>             |                               |         |                               |         |                            |         |
| No formal qualification/<br>lower secondary or below | -                             | -       | -                             | -       | -                          | -       |
| Secondary level qualification/<br>higher secondary   | 0.82 (0.58, 1.17)             | 0.27    | 0.80 (0.57, 1.12)             | 0.19    | 1.03 (0.47, 2.30)          | 0.94    |
| Post-secondary but below degree                      | 1.03 (0.72, 1.48)             | 0.87    | 1.26 (0.88, 1.79)             | 0.21    | 1.25 (0.56, 2.80)          | 0.58    |
| Degree or above                                      | 1.43 (1.02, 2.01)             | 0.04    | 1.75 (1.25, 2.44)             | <0.001  | 2.48 (1.14, 5.38)          | 0.02    |
| <b>Employment status</b>                             |                               |         |                               |         |                            |         |
| Employed                                             | -                             | -       | -                             | -       | -                          | -       |
| Full-time student                                    | 1.32 (1.06, 1.65)             | 0.01    | 2.08 (1.63, 2.65)             | <0.001  | -                          | -       |
| Unemployed                                           | 1.51 (1.21, 1.87)             | <0.001  | 1.19 (0.95, 1.48)             | 0.13    | -                          | -       |
| Retired                                              | 0.85 (0.70, 1.04)             | 0.11    | 0.49 (0.41, 0.60)             | <0.001  | -                          | -       |
| <b>Region</b>                                        |                               |         |                               |         |                            |         |
| HK                                                   | -                             | -       | -                             | -       | -                          | -       |
| UK                                                   | 0.34 (0.29, 0.39)             | <0.001  | 0.08 (0.07, 0.10)             | <0.001  | 0.53 (0.44, 0.64)          | <0.001  |
| <b>Perceived severity</b>                            |                               |         |                               |         |                            |         |
| Not serious                                          | -                             | -       | -                             | -       | -                          | -       |
| Serious                                              | 3.54 (3.05, 4.11)             | <0.001  | 8.19 (7.02, 9.56)             | <0.001  | 1.82 (1.50, 2.21)          | <0.001  |
| <b>Perceived ease of transmission</b>                |                               |         |                               |         |                            |         |
| Difficult                                            | -                             | -       | -                             | -       | -                          | -       |
| Easy                                                 | 2.52 (2.08, 3.06)             | <0.001  | 3.51 (2.92, 4.23)             | <0.001  | 1.42 (1.10, 1.84)          | 0.008   |
| <b>Anxiety level</b>                                 |                               |         |                               |         |                            |         |
| Normal                                               | -                             | -       | -                             | -       | -                          | -       |
| Borderline abnormal                                  | 1.84 (1.55, 2.18)             | <0.001  | 1.97 (1.66, 2.33)             | <0.001  | 1.64 (1.30, 2.08)          | <0.001  |
| Abnormal                                             | 2.43 (2.06, 2.85)             | <0.001  | 2.14 (1.82, 2.52)             | <0.001  | 1.82 (1.46, 2.26)          | <0.001  |

<sup>a</sup> "General" refers to avoiding going to: (i) crowded areas; (ii) social events; and (iii) going out.

<sup>b</sup> "Contact " refers to avoiding contacting individuals who (i) had a fever or respiratory symptoms; and (ii) had been to affected areas (UK) / Wuhan (HK) in the past 14 days (UK) / past month (HK).

<sup>c</sup> "Work" refers to avoiding going to work.
